# Supplementary material
Source: ML conference proceedings conference paper supplement (https://proceedings.neurips.cc/paper_files/paper/2022/hash/5d68a3f05ee2aae6a0fb2d94959082a0-Abstract.html)
Supplement: Supplementary file 1 [file 5d68a3f05ee2aae6a0fb2d94959082a0-Supplemental-Conference.pdf]

Proofs can be found in the full version of our paper at <https://arxiv.org/abs/2206.11397>.
